# Supplementary material for: Comparative Analysis of Cytokine Profiles in Cerebrospinal Fluid and Blood Serum in Patients with Acute and Subacute Spinal Cord Injury
Source: MDPI journal article supplement (doi:10.3390/biomedicines11102641), 2023-09-26
Supplement: s1 [file s1]

**Table S1.** Cytokine concentrations (ng/mL) in CSF and blood serum at 3, 7 and 14 days post-spinal cord injury in patients and uninjured control subjects.

| Cytokine      | CSF                 |                        |                      |                     | Blood Serum          |                        |                       |
|---------------|---------------------|------------------------|----------------------|---------------------|----------------------|------------------------|-----------------------|
|               | Uninjured Control   | 3 dpi                  | 7 dpi                | 14 dpi              | Uninjured Control    | 3 dpi                  | 7 dpi                 |
| CCL26         | 1.83 (1.49)         | 26.53 (49.22)          | 12.71 (18.73)        | 29.89 (71.25)       | 2.00 (1.46)          | 14.87 (29.67)          | 9.49 (9.47)           |
|               | 2.06 (0.44–3.06)    | 13.58 (2.95–20.28) *   | 7.98 (1.83–13.83) *  | 8.69 (1.83–18.32)   | 1.38 (0.93–2.46)     | 8.34 (3.77–13.77) **   | 7.97 (0.97–11.88) *   |
| IL8           | 85.76 (58.74)       | 394.96 (608.69)        | 45.90 (74.71)        | 85.05 (176.30)      | 3.92 (3.91)          | 37.58 (171.92)         | 2.06 (6.13)           |
|               | 7.23 (0.73–19.03)   | 49.05 (25.82–606.05) * | 15.77 (0.46–40.11)   | 14.86 (3.39–42.92)  | 1.72 (0.69–7.43)     | 0.59 (0.05–1.34) *     | 0.64 (0.05–1.15) *    |
| IL6           | 770.85 (308.25)     | 3299.32 (5184.97)      | 802.66 (2543.30)     | 385.09 (890.10)     | 6.54 (7.19)          | 4595.94 (21495.77)     | 6.15 (9.12)           |
|               | 2.72 (0.34–7.47)    | 159.82 (20.36–6097) ** | 28.66 (0.87–275.19)  | 7.05 (5.10–66.34)   | 5.03 (2.45–5.61)     | 5.84 (3.32–11.32)      | 1.70 (0.22–7.33)      |
| CCL23         | 3.79 (3.63)         | 58.16 (91.97)          | 33.85 (52.82)        | 31.76 (70.31)       | 74.37 (148.79)       | 114.60 (190.44)        | 474.01 (1991.08)      |
|               | 2.54 (0.73–6.46)    | 21.05 (11.69–56.93) ** | 8.12 (2.40–27.35)    | 7.17 (1.61–11.04)   | 15.56 (6.23–77.32)   | 28.73 (11.06–168.27)   | 13.78 (7.39–122.53)   |
| CCL22         | 13.67 (15.44)       | 54.74 (49.80)          | 25.78 (30.02)        | 84.57 (293.49)      | 10.41 (9.80)         | 36.36 (41.16)          | 42.83 (107.43)        |
|               | 9.38 (3.39–14.78)   | 25.37 (15.43–88.21) *  | 16.30 (11.54–21.33)  | 12.44 (7.19–25.98)  | 7.10 (3.43–14.99)    | 15.31 (9.28–51.76)     | 16.63 (8.46–23.18)    |
| IL1b          | 0.51 (0.44)         | 1.47 (2.04)            | 0.59 (0.64)          | 1.15 (2.12)         | 5.08 (1.67)          | 0.78 (0.62)            | 0.59 (0.64)           |
|               | 0.18 (0.10–0.80)    | 0.71 (0.31–1.50)       | 0.47 (0.11–0.79)     | 0.68 (0.11–0.96)    | 5.33 (3.77–6.51)     | 0.76 (0.40–1.09) #     | 0.50 (0.02–0.88) #    |
| CXCL9         | 42.46 (64.80)       | 22.73 (27.37)          | 12.52 (12.89)        | 48.43 (156.97)      | 114.44 (154.44)      | 14.99 (14.80)          | 15.48 (23.09)         |
|               | 5.21 (2.18–59.83)   | 7.24 (3.62–35.97)      | 7.74 (2.65–19.68)    | 5.54 (2.33–13.18)   | 70.53 (40.30–136.71) | 9.45 (3.28–24.02) #    | 6.57 (2.65–14.88) #   |
| IFN- $\gamma$ | 11.31 (5.11)        | 17.21 (17.34)          | 12.60 (9.19)         | 17.10 (10.70)       | 0.42 (0.20)          | 10.78 (8.55)           | 9.40 (10.13)          |
|               | 8.79 (3.71–11.77)   | 14.55 (3.92–25.39)     | 13.82 (8.26–16.27)   | 15.13 (8.50–24.89)  | 0.39 (0.24–0.60)     | 10.36 (3.90–16.69) #   | 5.76 (0.40–16.27) **  |
| IL10          | 3.61 (3.32)         | 18.06 (31.71)          | 6.04 (9.52)          | 5.83 (7.82)         | 12.40 (7.81)         | 6.45 (17.49)           | 3.15 (5.28)           |
|               | 1.73 (0.13–3.64)    | 9.59 (4.21–13.60)      | 2.74 (1.00–7.65)     | 2.91 (0.64–7.36)    | 12.14 (6.47–15.23)   | 2.98 (0.13–4.07) **    | 0.57 (0.13–3.70) #    |
| CXCL6         | 10.16 (11.95)       | 10.61 (7.26)           | 6.66 (9.04)          | 31.12 (86.38)       | 2.61 (2.25)          | 7.62 (5.79)            | 10.31 (9.01)          |
|               | 3.24 (0.73–18.61)   | 11.86 (5.68–13.90)     | 5.74 (0.73–7.47)     | 6.19 (2.70–9.41)    | 2.07 (0.80–3.11)     | 5.95 (4.32–10.59) **   | 8.75 (6.67–13.21) **  |
| CXCL11        | 0.45 (0.49)         | 1.31 (1.27)            | 0.99 (1.11)          | 2.25 (4.29)         | 72.70 (175.50)       | 1.56 (2.41)            | 0.92 (1.33)           |
|               | 0.35 (0.04–0.65)    | 0.93 (0.42–2.04)       | 0.77 (0.01–1.02)     | 0.74 (0.28–1.72)    | 2.02 (1.21–36.61)    | 0.68 (0.01–1.51) **    | 0.23 (0.01–1.51) **   |
| IL4           | 3.44 (2.08)         | 6.27 (5.05)            | 3.37 (2.92)          | 5.14 (4.29)         | 1.58 (1.21)          | 5.00 (4.29)            | 6.08 (5.04)           |
|               | 1.49 (0.58–5.03)    | 6.20 (2.56–9.03)       | 3.50 (0.15–4.87)     | 4.36 (2.35–5.99)    | 1.00 (0.82–2.26)     | 4.50 (3.81–5.11) *     | 4.86 (3.81–7.89) **   |
| CCL7          | 16.75 (13.56)       | 57.68 (88.45)          | 63.76 (86.88)        | 37.07 (22.39)       | 10.28 (5.16)         | 27.90 (17.13)          | 26.32 (22.44)         |
|               | 18.92 (2.59–28.49)  | 33.15 (12.75–58.73)    | 33.15 (24.61–62.72)  | 35.78 (27.26–51.57) | 12.02 (6.15–13.56)   | 27.78 (15.86–37.12) ** | 20.38 (10.29–35.92) * |
| CCL3          | 1.13 (1.51)         | 4.40 (8.90)            | 2.77 (3.68)          | 3.52 (4.26)         | 3.45 (3.65)          | 1.80 (2.72)            | 1.66 (2.06)           |
|               | 0.64 (0.11–1.30)    | 2.01 (0.72–3.27)       | 1.11 (0.74–3.65)     | 1.99 (1.15–3.43)    | 2.19 (1.51–3.95)     | 0.99 (0.79–1.37) *     | 1.08 (0.46–1.69) *    |
| CCL17         | 2.48 (2.61)         | 8.96 (10.43)           | 5.25 (5.82)          | 8.00 (13.07)        | 55.24 (82.44)        | 17.47 (22.41)          | 6.22 (9.66)           |
|               | 1.04 (0.35–5.24)    | 2.02 (0.61–15.46)      | 1.27 (0.60–10.33)    | 1.50 (0.50–10.95)   | 25.96 (7.71–39.98)   | 5.10 (0.12–30.80)      | 0.08 (0.08–11.25) #   |
| CCL8          | 1.84 (2.00)         | 21.46 (44.34)          | 10.40 (16.67)        | 37.70 (101.13)      | 22.55 (21.68)        | 8.84 (13.36)           | 6.76 (7.42)           |
|               | 1.13 (0.26–2.86)    | 4.19 (2.00–9.58)       | 2.02 (1.10–13.12)    | 5.11 (0.97–12.44)   | 13.56 (5.74–34.23)   | 5.42 (3.73–8.80)       | 4.67 (1.18–9.77) **   |
| CCL19         | 37.07 (42.37)       | 55.46 (46.23)          | 102.12 (150.85)      | 72.25 (62.93)       | 74.32 (64.38)        | 27.17 (30.54)          | 15.05 (21.11)         |
|               | 25.28 (10.48–46.36) | 46.69 (12.32–83.93)    | 57.89 (11.93–144.13) | 61.54 (27.76–92.07) | 67.44 (8.54–114.62)  | 15.84 (3.62–40.38)     | 3.39 (0.84–18.98) **  |
| IL16          | 35.71 (16.60)       | 99.85 (160.59)         | 37.29 (35.50)        | 47.55 (63.34)       | 119.37 (154.81)      | 63.89 (103.36)         | 39.12 (99.61)         |
|               | 15.86 (8.70–82.28)  | 31.05 (20.36–90.12)    | 27.14 (17.44–56.47)  | 24.76 (14.85–49.33) | 71.38 (27.64–131.39) | 25.20 (11.42–36.90)    | 15.25 (7.65–29.64) ** |
| GMCSF         | 4.47 (11.94)        | 14.86 (17.74)          | 9.70 (10.92)         | 13.26 (15.60)       | 13.03 (8.07)         | 7.14 (7.80)            | 6.18 (10.36)          |
|               | 0.45 (0.19–3.51)    | 8.37 (1.18–20.88)      | 4.18 (0.19–16.60)    | 3.81 (1.80–21.19)   | 8.81 (7.62–17.18)    | 5.70 (0.19–11.97)      | 0.42 (0.19–11.13) **  |

\* Padj < 0.05, \*\* Padj < 0.01, and # Padj < 0.0001 comparing to uninjured control subjects.
